# Supplementary material
Source: publisher figshare collection journal article supplement (https://diabetesjournals.figshare.com/articles/dataset/_/25731582)
Supplement: Supplementary file 2 [file 1]

**Supplemental Figure 2. Violin plots of outcome metrics in individual fibers from the same biopsy sample in each participant.** Each participant is numbered (1-13 on the x-axis). Data from type 1 fibers are shown in gray and data from type 2 fibers are shown in blue. Standard deviations (SD) of each dataset are printed above the data. (A) Fiber lipid droplet metrics. (B) Fiber mechanics metrics. We show data from 4-5 of the 7 participants in the Control group, 4 of the 11 participants in the Pre-Diabetes group, and 4 of the 11 participants in the Diabetes group who had both lipid droplet and fiber mechanics data assessed in the same biospecimen.

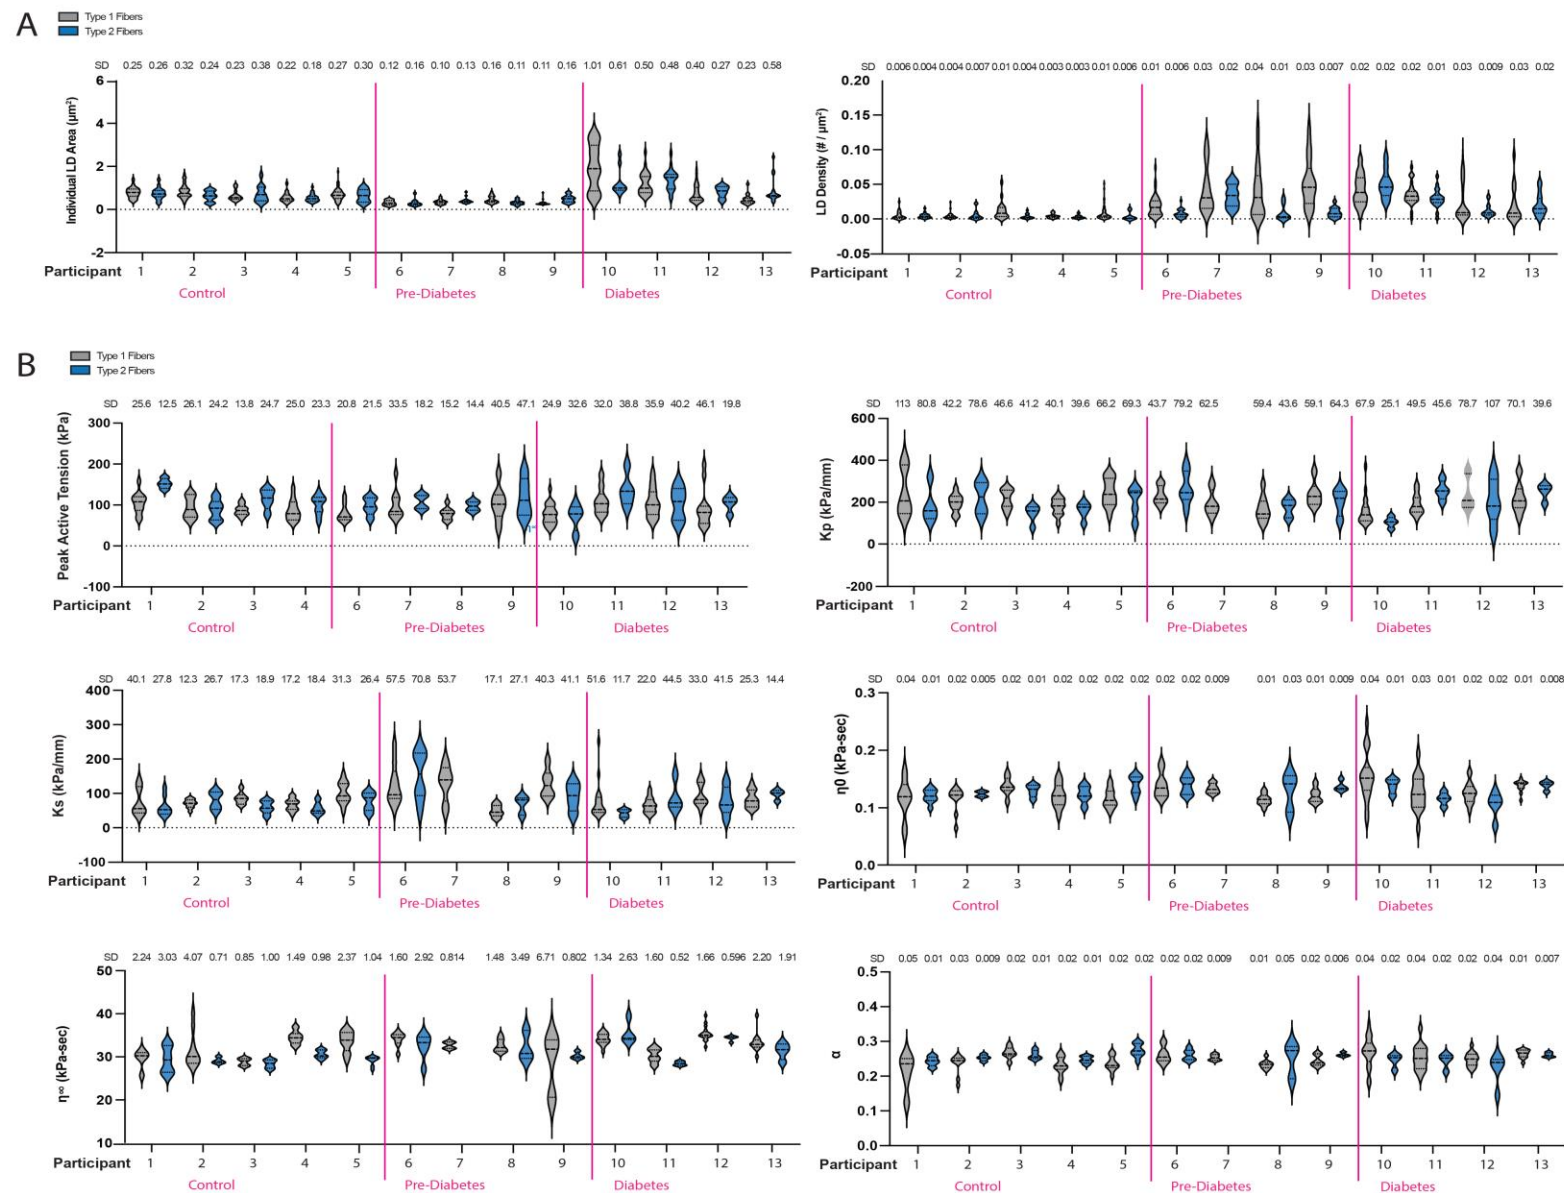

**Supplemental Table 1. Participant characteristics and lipid droplet (LD) outcomes subdivided by study (Study 1 vs Study 2) or biopsy source (Gastrocnemius vs Peroneus Longus/Calf).** Study 1 obtained needle biopsies from the gastrocnemius muscle while Study 2 obtained muscle biopsies during below-knee amputation surgery. Participants from both studies are included in the Pre-Diabetes group and only differ by age ( $p<0.05$ ; t-test). Study 2 obtained muscle biopsies from the gastrocnemius ( $n=10$ ), peroneus longus ( $n=2$ ) or an unspecified muscle of the calf ( $n=3$ ), depending on the parameters of the surgery. No significant differences in lipid droplet outcomes were found by muscle source.

|                                        | Study 1         | Study 2         |  | Study 2           |          |  | Study 2           |                              |
|----------------------------------------|-----------------|-----------------|--|-------------------|----------|--|-------------------|------------------------------|
|                                        | Pre-Diabetes    | Pre-Diabetes    |  | Pre-Diabetes      |          |  | Diabetes          |                              |
| Parameter                              |                 |                 |  | Gastrocnemius (3) | Calf (1) |  | Gastrocnemius (7) | Peroneus Longus and Calf (4) |
| M/F                                    | 2/5             | 1/3             |  | 1/2               | 0/1      |  | 5/2               | 2/2                          |
| Age (y)                                | 67.4±6.1        | 44.8 ± 14.9 (a) |  | 50.0±13.0         | 29       |  | 60.0±4.0          | 51.8±10.4                    |
| BMI (kg/m <sup>2</sup> )               | 30.61±3.6       | 32.43 ± 4.11    |  | 30.54±1.99        | 38.09    |  | 34.28±7.16        | 35.14±6.78                   |
|                                        |                 |                 |  |                   |          |  |                   |                              |
| Fasting Glucose (mg/dL)                | 98.14±9.72      | 115.25±22.10    |  | 111.0±25.0        | 128      |  | 179.43±78.93      | 168.75±38.07                 |
| HbA1c                                  | 5.4±0.3         | 5.3±0.4         |  |                   |          |  |                   |                              |
|                                        |                 |                 |  |                   |          |  |                   |                              |
| Type 1 (%)                             | 63.30±13.04     | 75.26±15.80     |  | 70.83±16.02       | 88.54    |  | 48.47±26.28       | 68.46±16.85                  |
| Type 2 (%)                             | 28.55±19.73     | 24.74±15.80     |  | 29.17±16.02       | 11.46    |  | 51.53±26.28       | 31.53±16.85                  |
| Type 1 Area (μm <sup>2</sup> )         | 5750.83±1517.86 | 4348.16±1352.76 |  | 4898.56±962.95    | 2696.95  |  | 5828.09±2080.77   | 4261.22±1183.36              |
| Type 2 Area (μm <sup>2</sup> )         | 5355.10±1812.34 | 3576.67±548.55  |  | 3613.44±664.53    | 3466.36  |  | 5153.85±2688.36   | 4961.39±1906.16              |
| Type 1 LD area (μm <sup>2</sup> )      | 0.46±0.19       | 0.64±0.32       |  | 0.75±0.28         | 0.3      |  | 1.20±0.44         | 0.91±0.38                    |
| Type 2 LD area (μm <sup>2</sup> )      | 0.59±0.24       | 0.76±0.20       |  | 0.86±0.11         | 0.49     |  | 1.47±0.29         | 1.26±0.53                    |
| Type 1 LD density (#/μm <sup>2</sup> ) | 0.033±0.011     | 0.044±0.020     |  | 0.045±0.003       | 0.052    |  | 0.018±0.009       | 0.023±0.011                  |
| Type 2 LD density (#/μm <sup>2</sup> ) | 0.014±0.010     | 0.018±0.010     |  | 0.021±0.010       | 0.009    |  | 0.032±0.013       | 0.026±0.013                  |
